# Supplementary material for: Chemical dynamics simulations of CID of peptide ions: comparisons between TIK(H+)2and TLK(H+)2fragmentation dynamics, and with thermal simulations
Source: Royal Society of Chemistry journal article supplement (doi:10.1039/c7cp06818b), 2018-01-01
Supplement: c7cp06818b1.pdf [file c7cp06818b1.pdf]

**Chemical Dynamics Simulations of Peptide Ion CID. Comparisons between  
TIK(H<sup>+</sup>)<sub>2</sub> and TLK(H<sup>+</sup>)<sub>2</sub> Fragmentation Dynamics, and with Thermal Simulations**

Zahra Homayoon,<sup>a</sup> Veronica Macaluso,<sup>b</sup> Ana Martin Somer,<sup>b</sup>  
Maria Carolina Nicola Barbosa Muniz,<sup>c</sup> Itamar Borges, Jr.,<sup>c</sup>  
William L. Hase,<sup>a,\*</sup> and Riccardo Spezia<sup>b,\*</sup>

<sup>a</sup>Department of Chemistry and Biochemistry  
Texas Tech University  
Lubbock, Texas 79409-1061 USA

<sup>b</sup>Laboratoire Analyse et Modélisation pour la Biologie et l'Environnement  
Université d'Evry Val d'Essonne  
UMR 8587 CNRS-CEA-UEVE  
Bd. F. Mitterrand, 91025 Evry Cedex, France

<sup>c</sup>Departamento de Química  
Instituto Militar de Engenharia  
22291-270, Rio de Janeiro, RJ, Brazil.

**SUPPORTING INFORMATION**

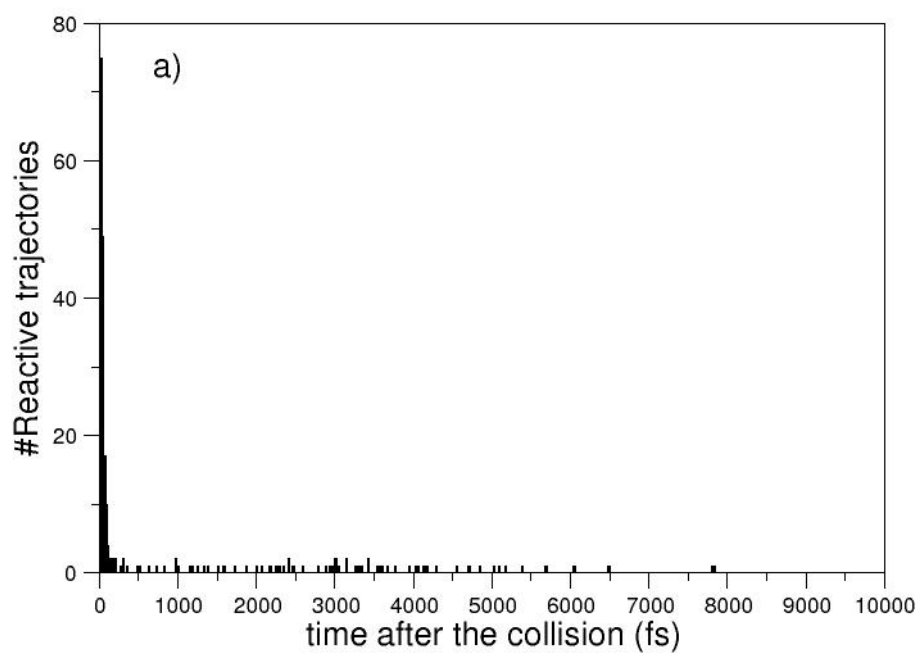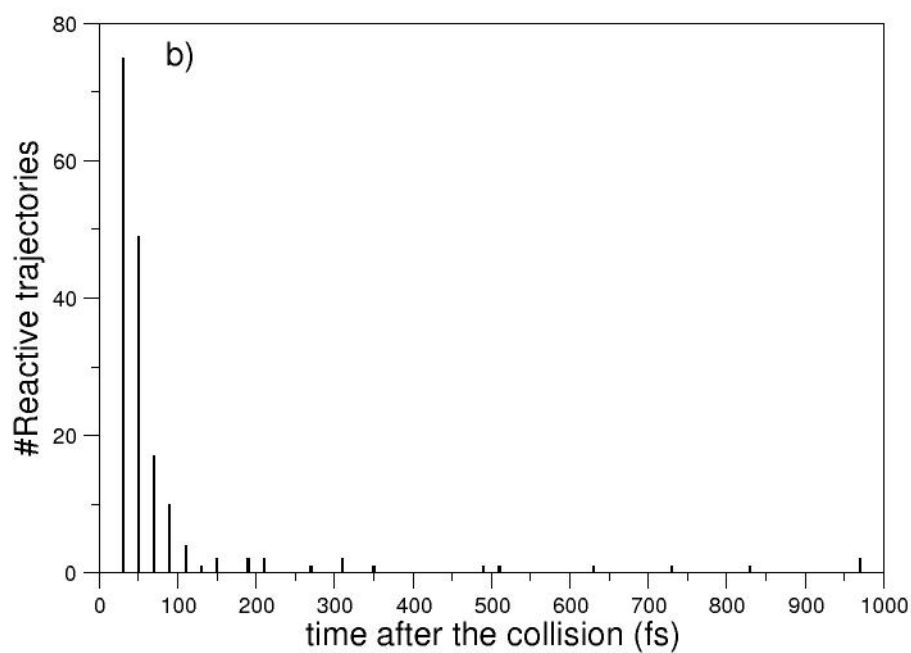

**Figure S1.** Number of reactive trajectories as a function of time after the collision with  $\text{N}_2$  projectile as obtained from  $\text{TLK}(\text{H}^+)_2$  simulation at  $\text{CE}=13$  eV. Panel a) shows the counting over the whole simulation time, while panel b) shows a zoom over the first pico-second.

### Pathway 1

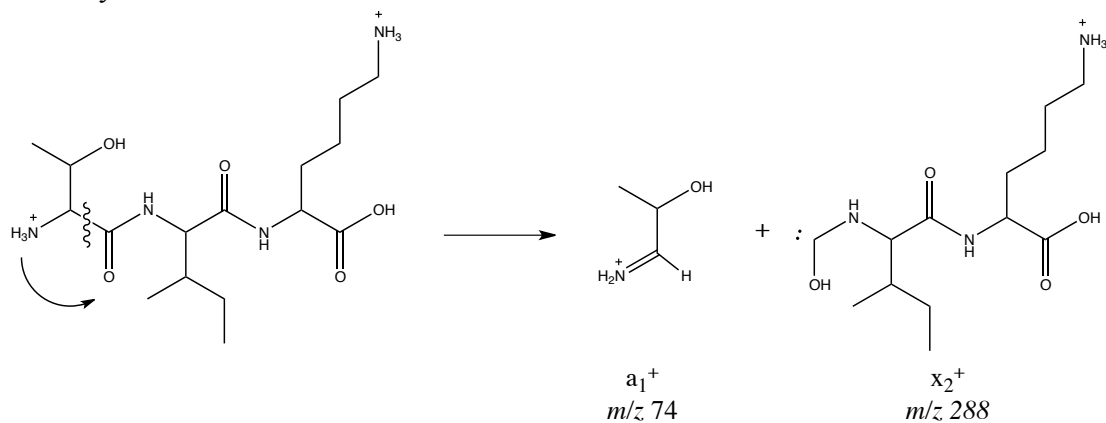

### Pathway 2

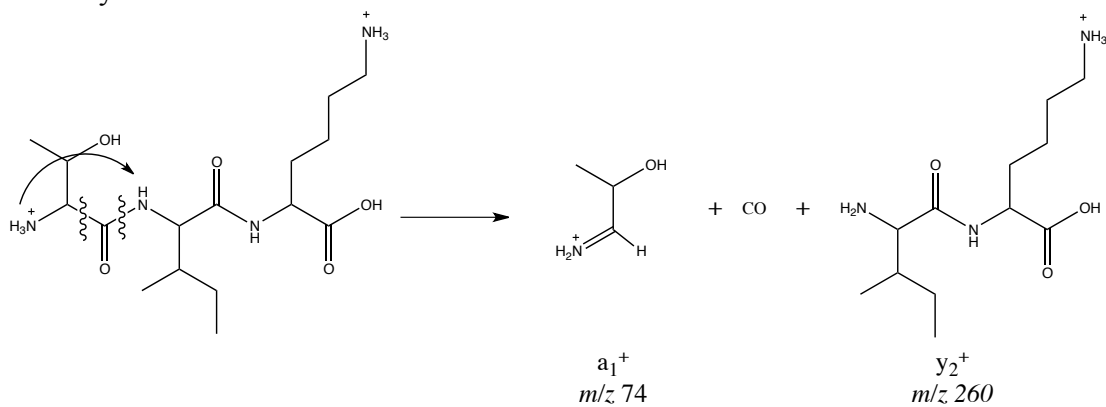

### Pathway 3

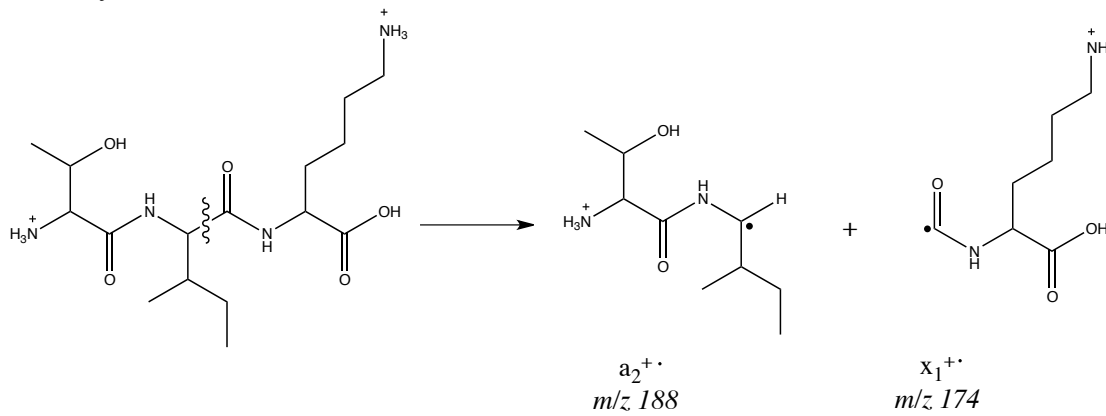

### Pathway 4

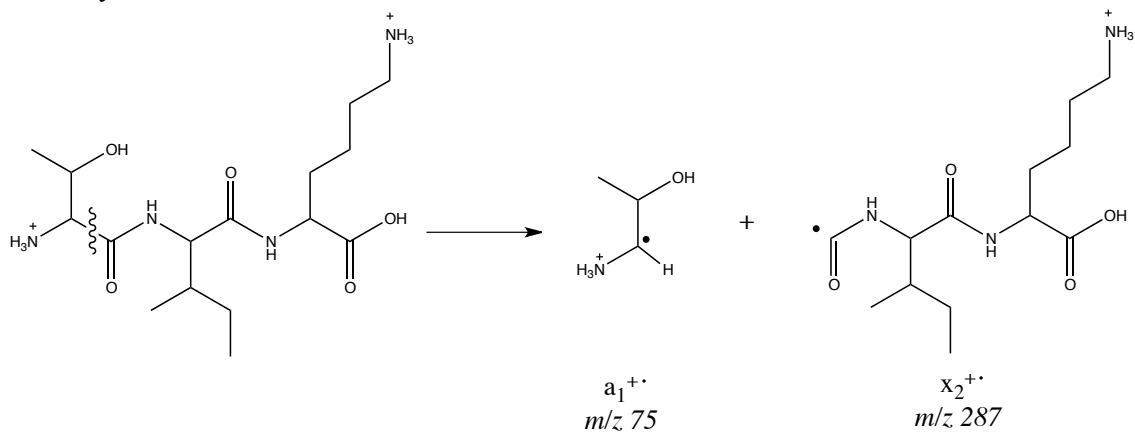

Pathway 5

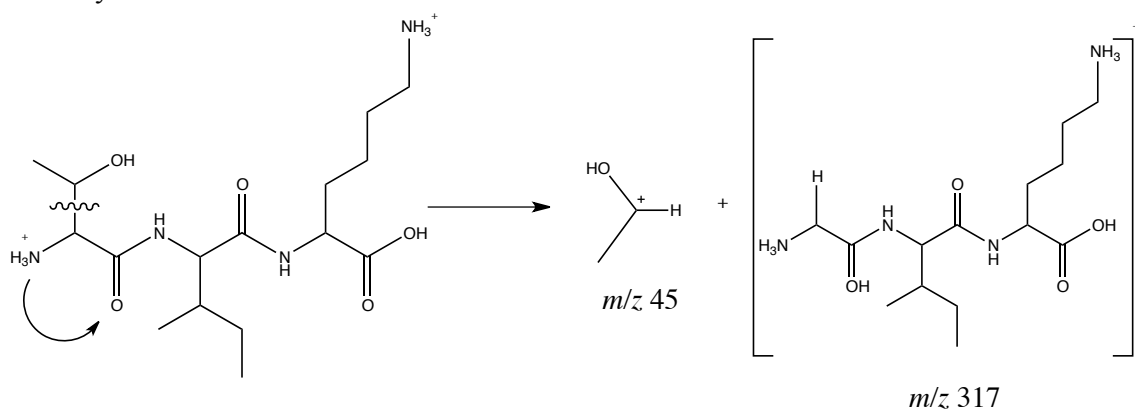

Pathway 6

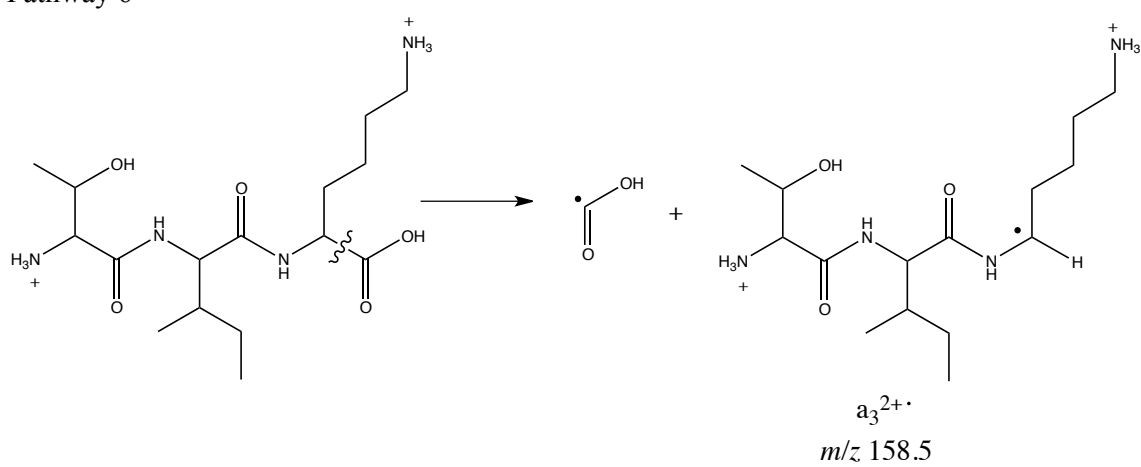

Pathway 7

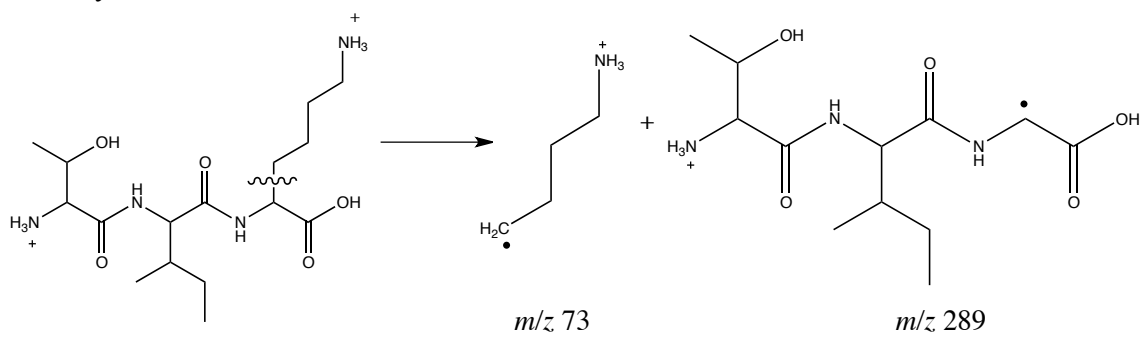

Pathway 8

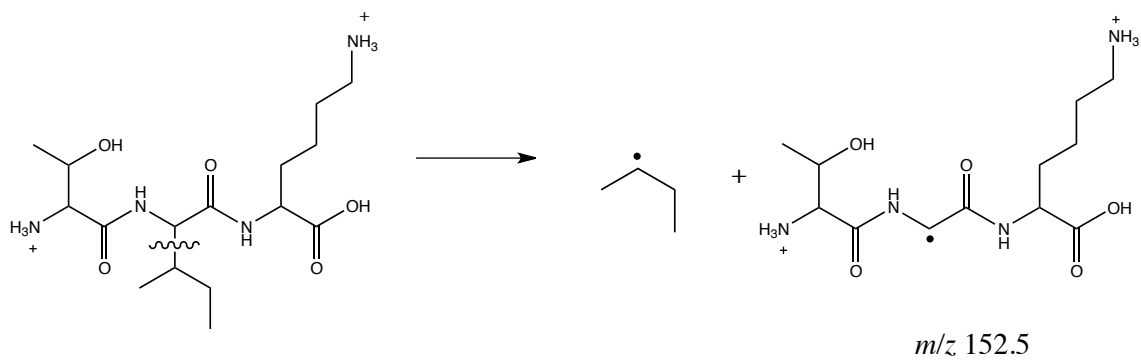

Pathway 9

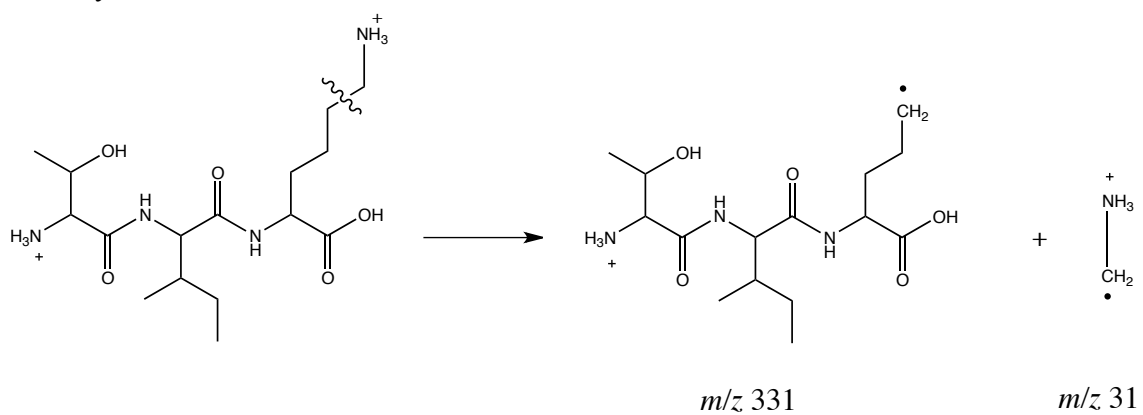

Pathway 10

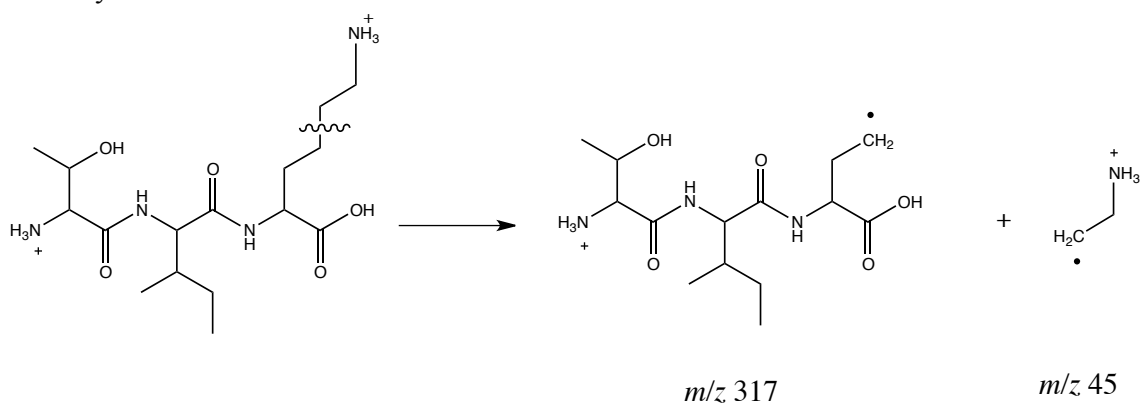

Pathway 11

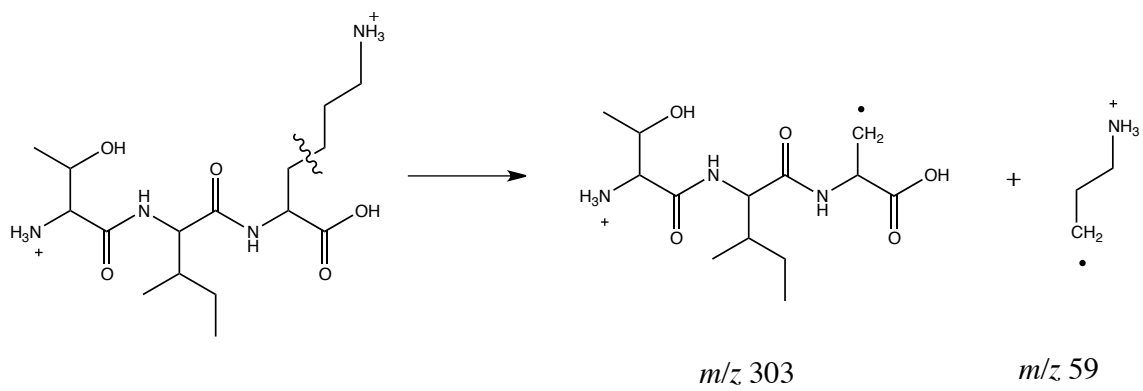

Pathway 12

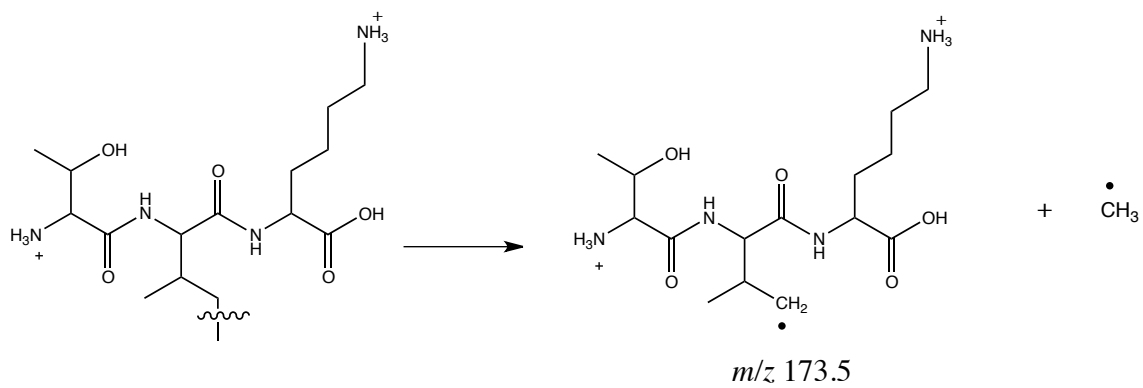

### Pathway 13

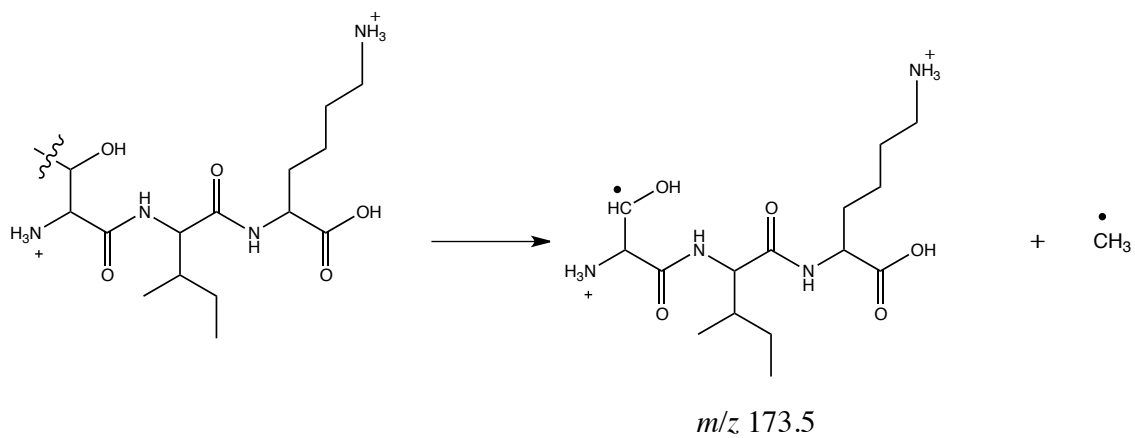

### Pathway 14

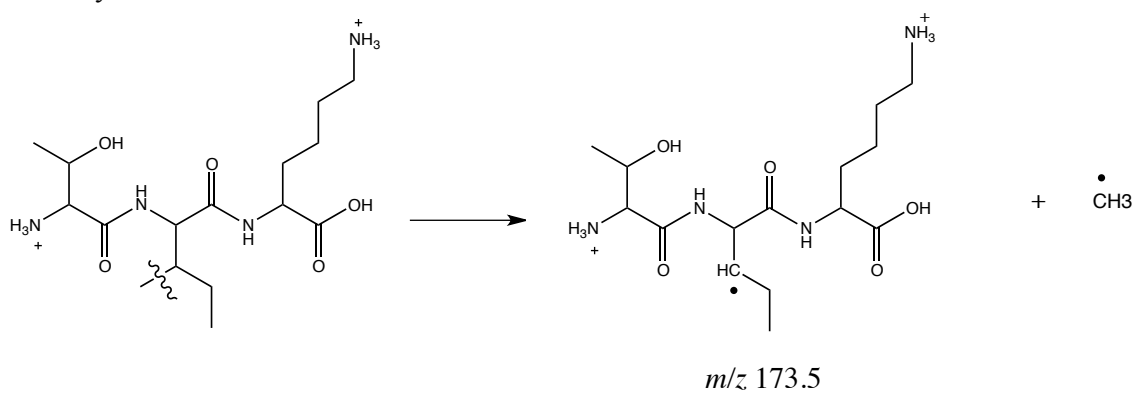

### Pathway 15

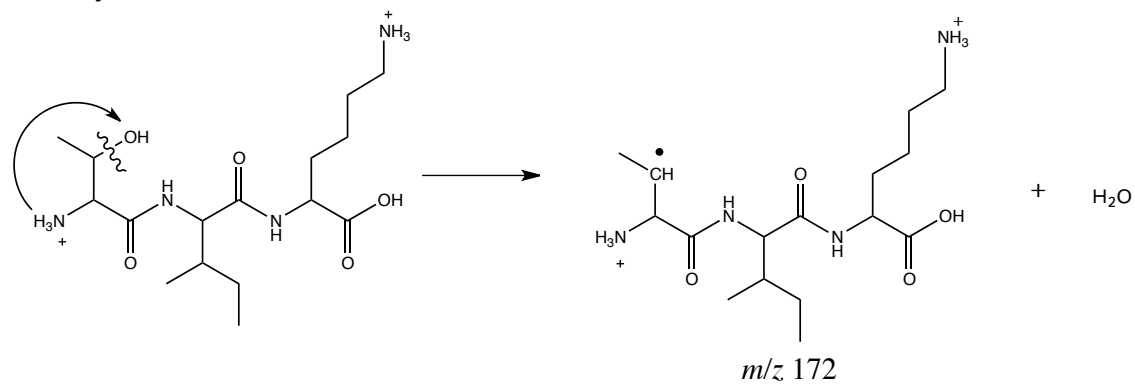

### Pathway 16

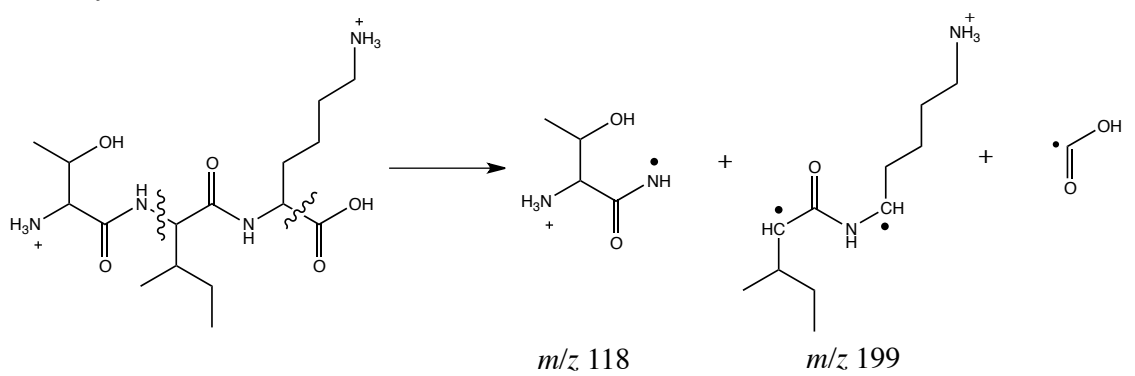

### Pathway 17

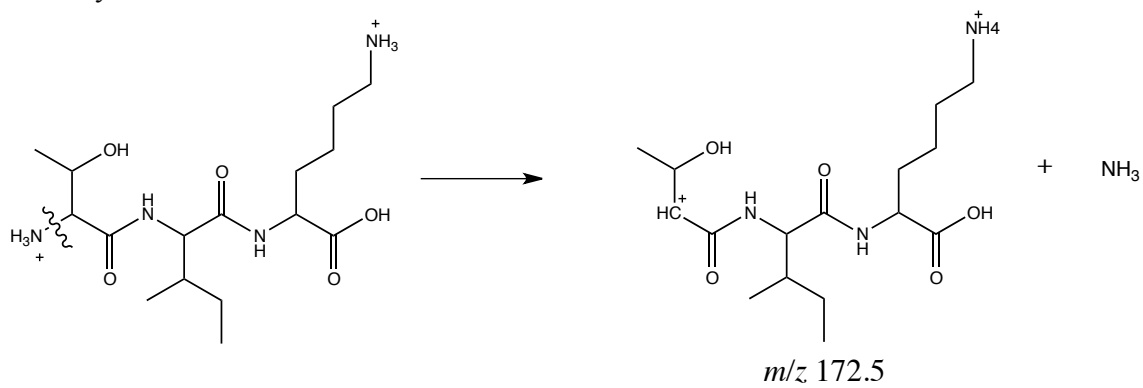

### Pathway 18

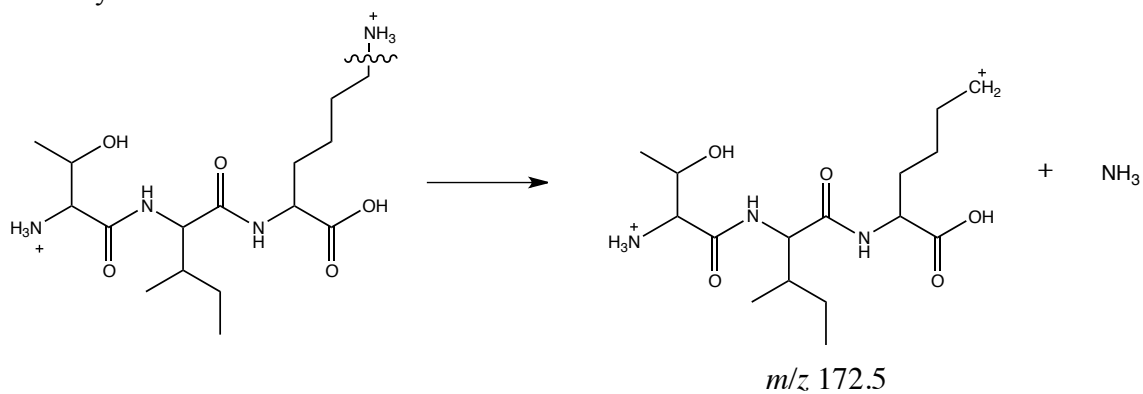

### Pathway 19

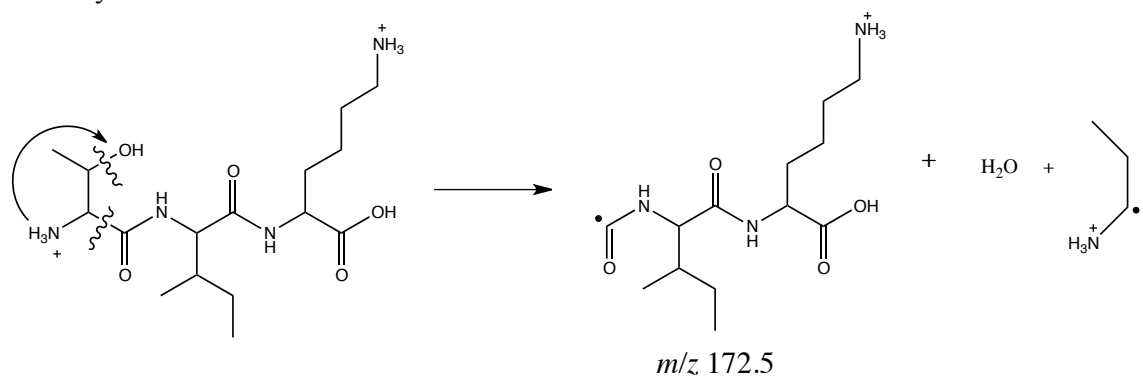

### Pathway 20

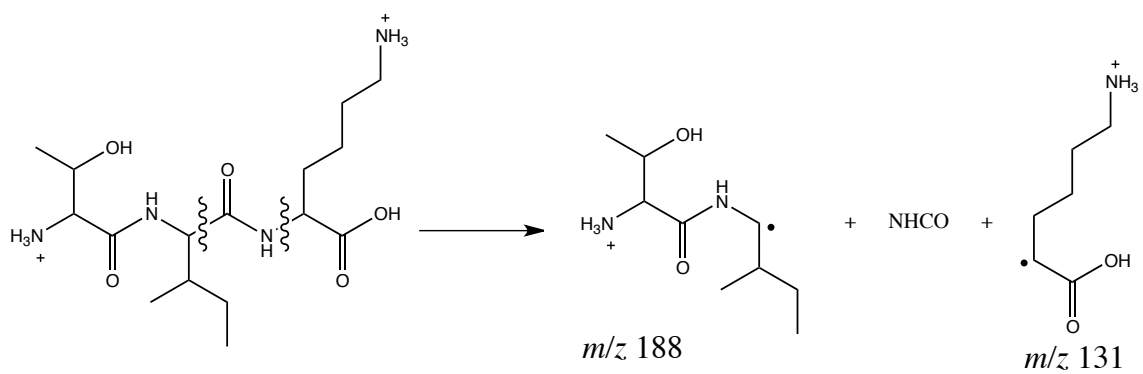

**Figure S2.** Primary dissociation pathways as from Ref. 29 of the manuscript



### Pathway 3

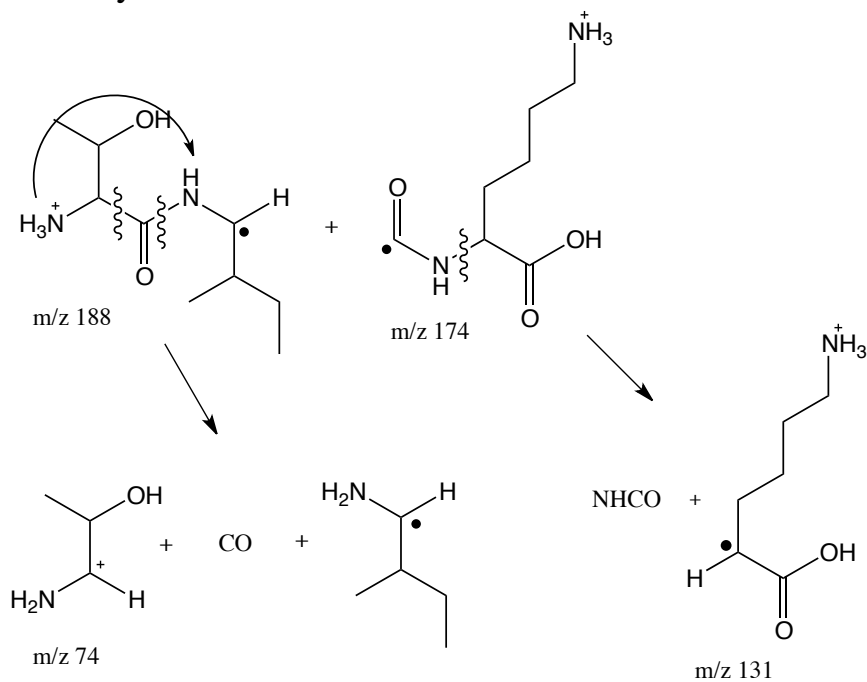

### Pathway 4

1)

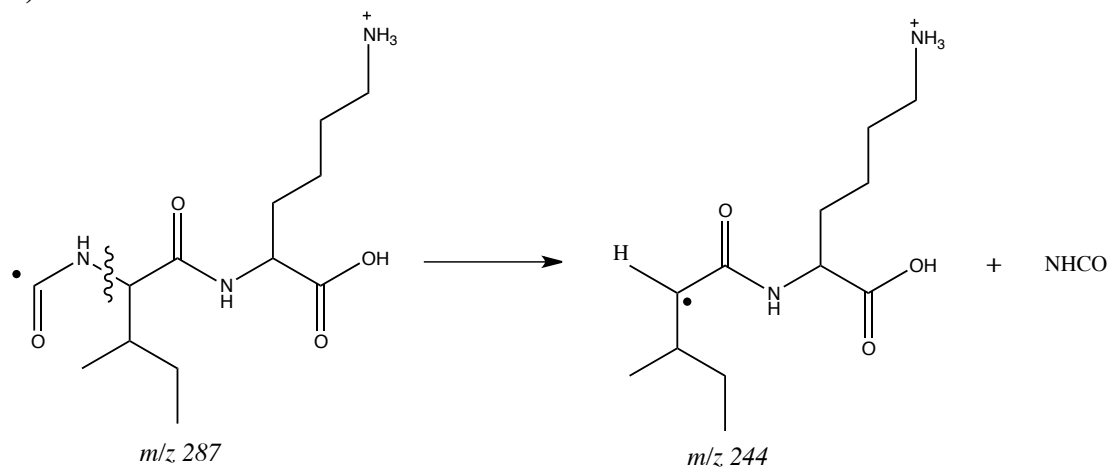

2)

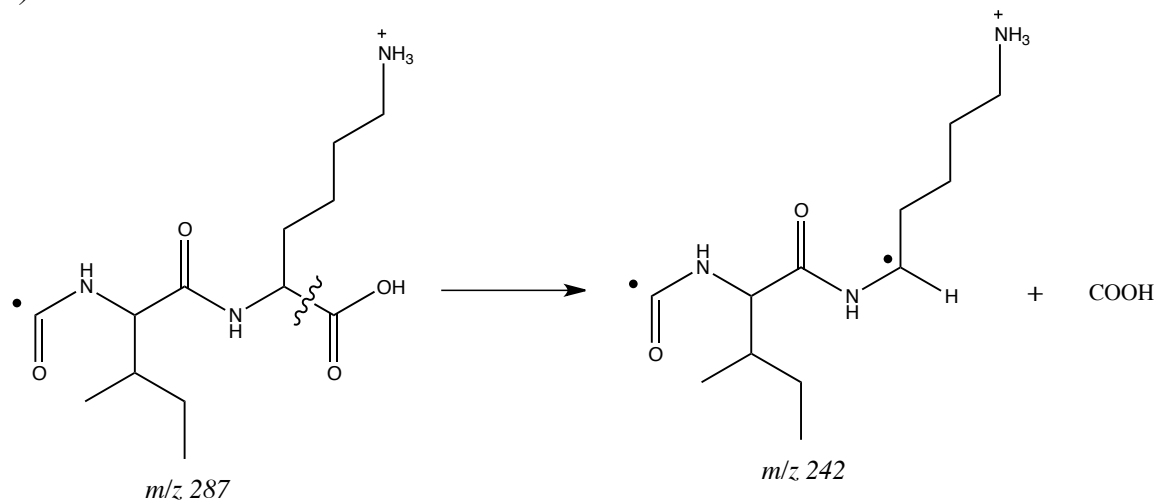

## Pathway 5

1)

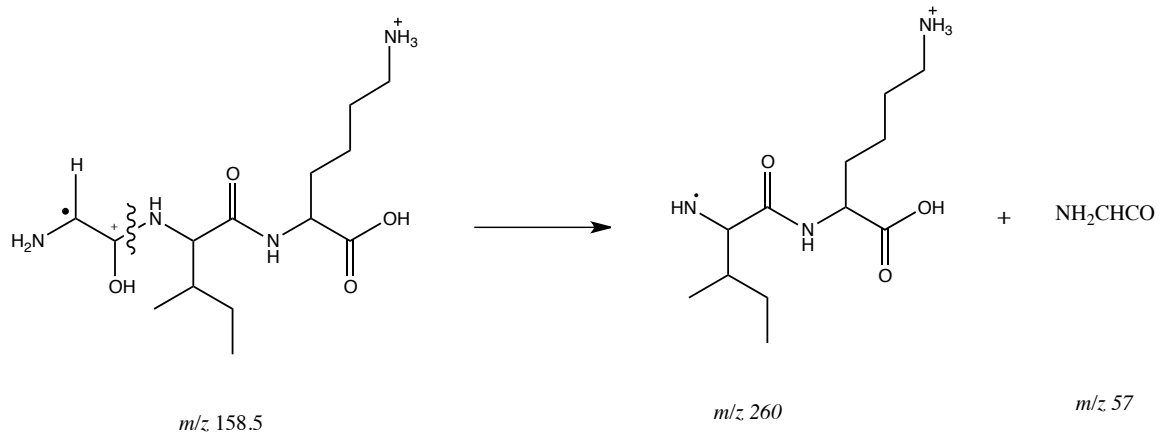

2)

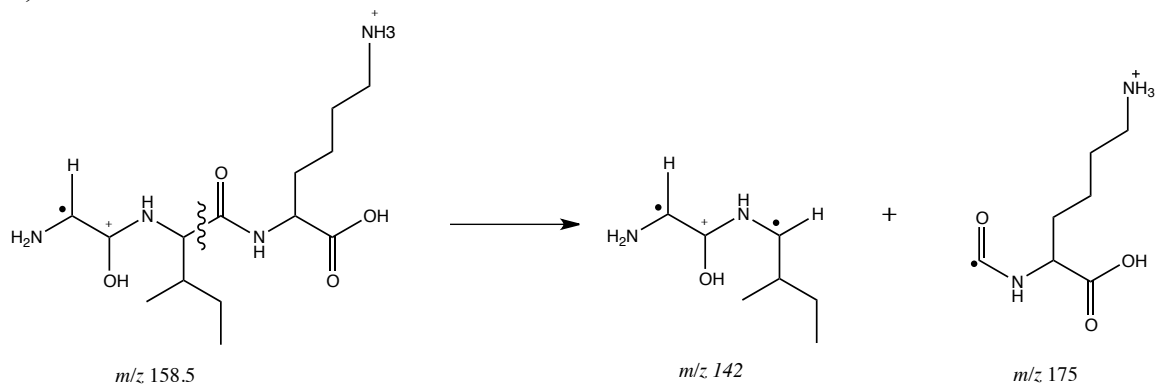

## Pathway 6

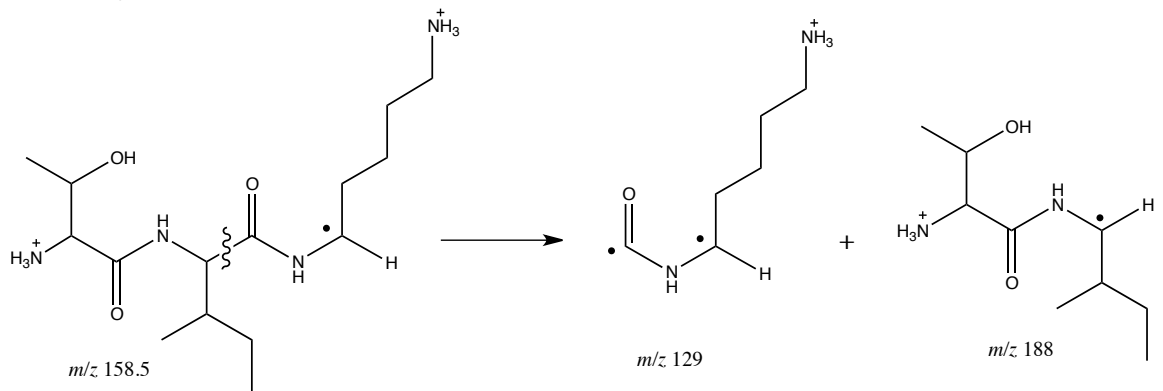

## Pathway 8

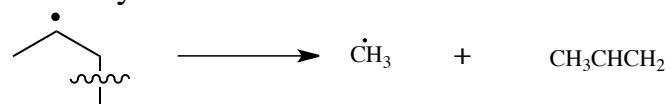

## Pathway 9

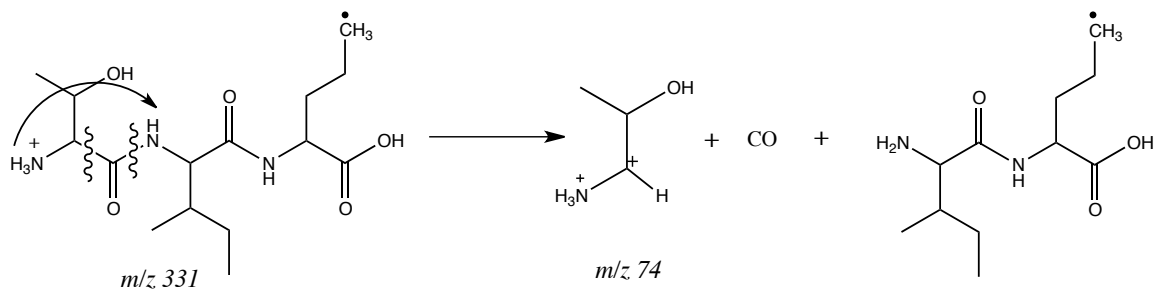

### Pathway 11

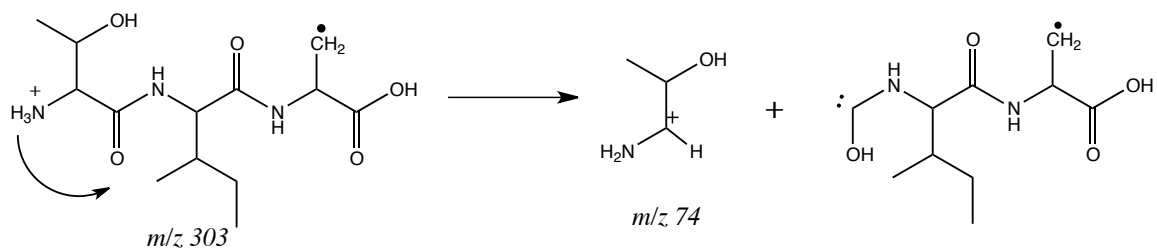

### Pathway 14

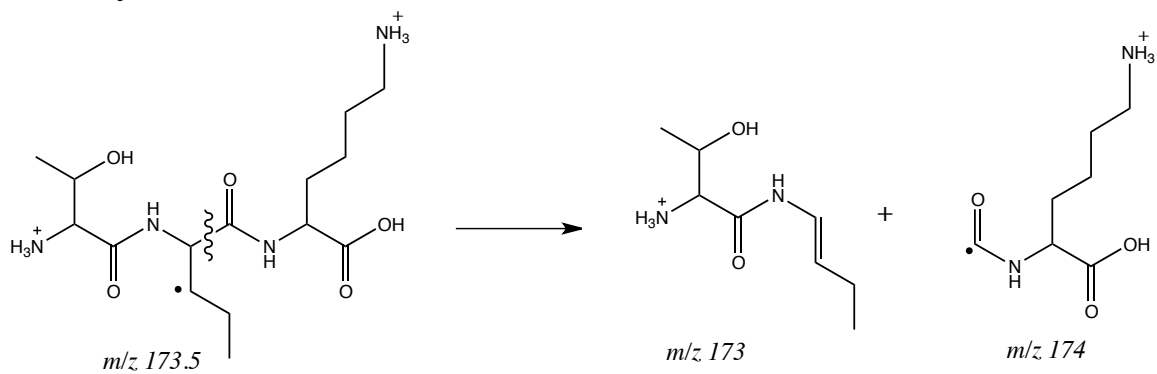

### Pathway 15

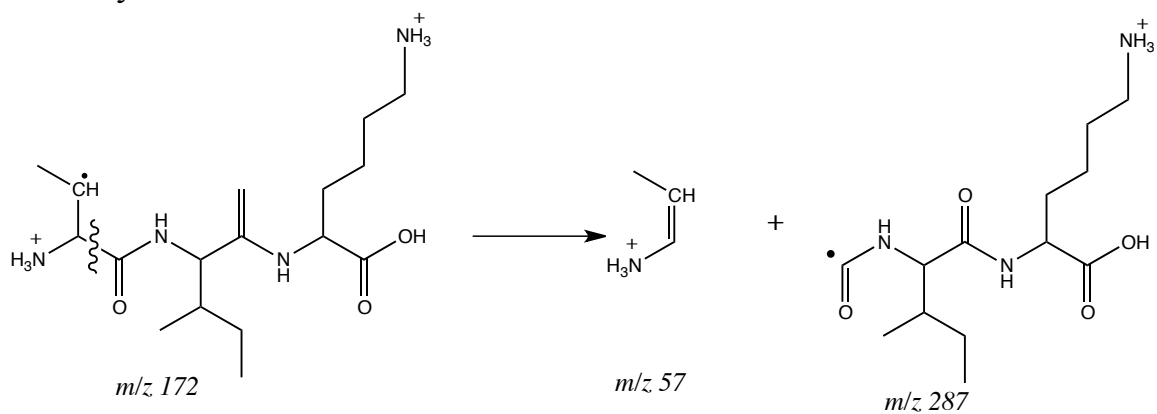

### Pathway 18

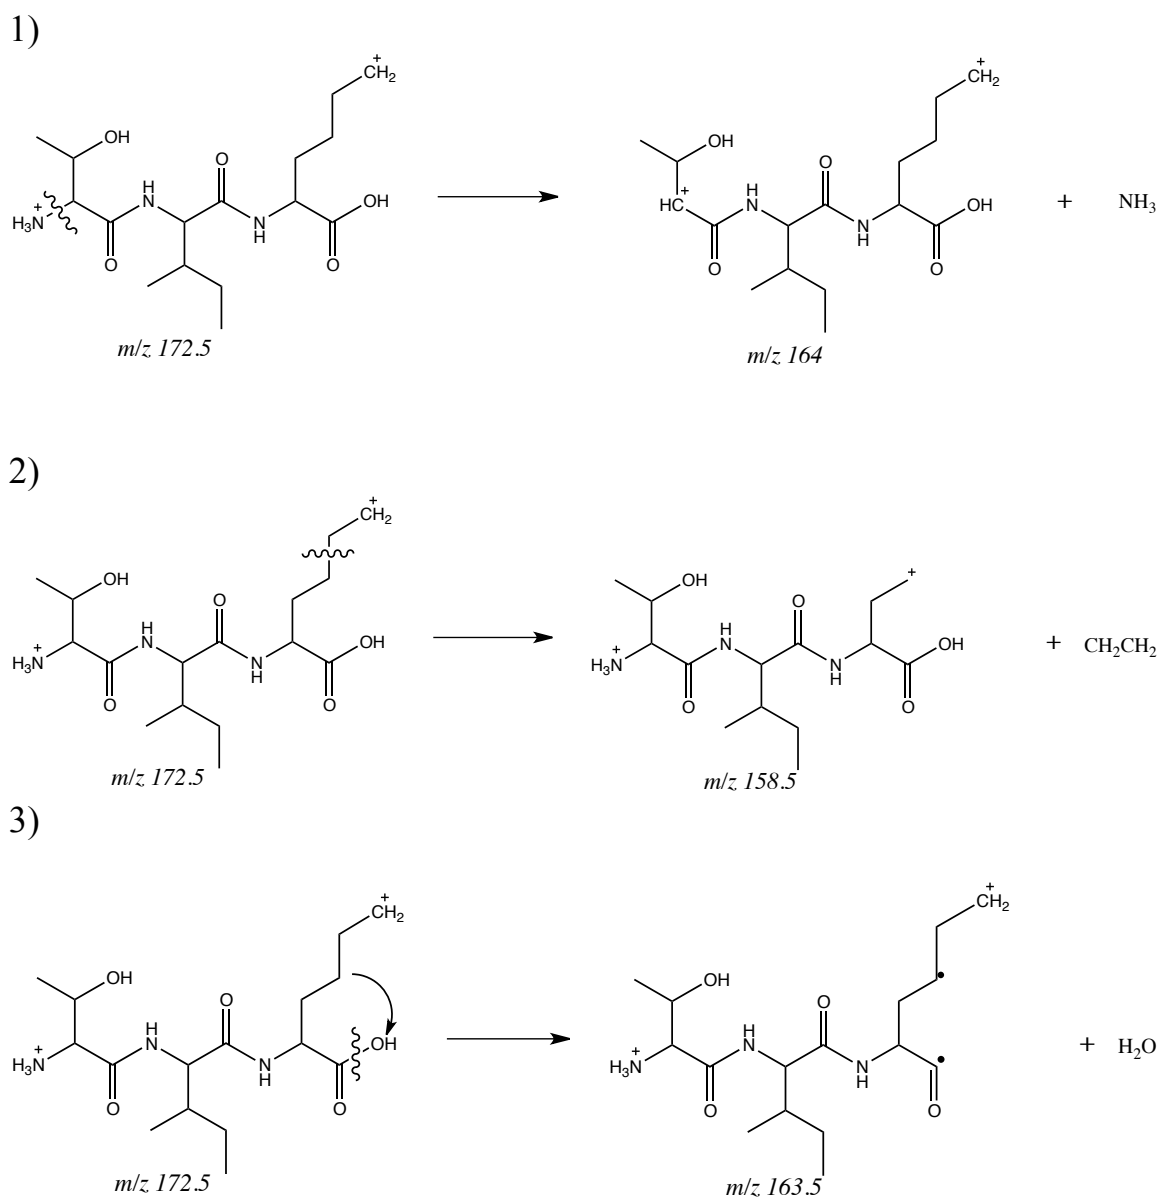

**Figure S3.** Secondary dissociations for TIK( $\text{H}^+$ )<sub>2</sub> primary dissociation pathways at  $E_{rel} = 13.0$  eV.

Pathway 3'

1)

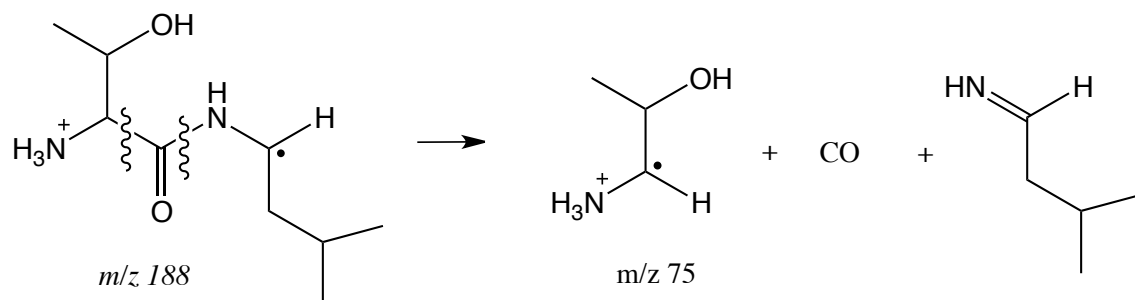

2)

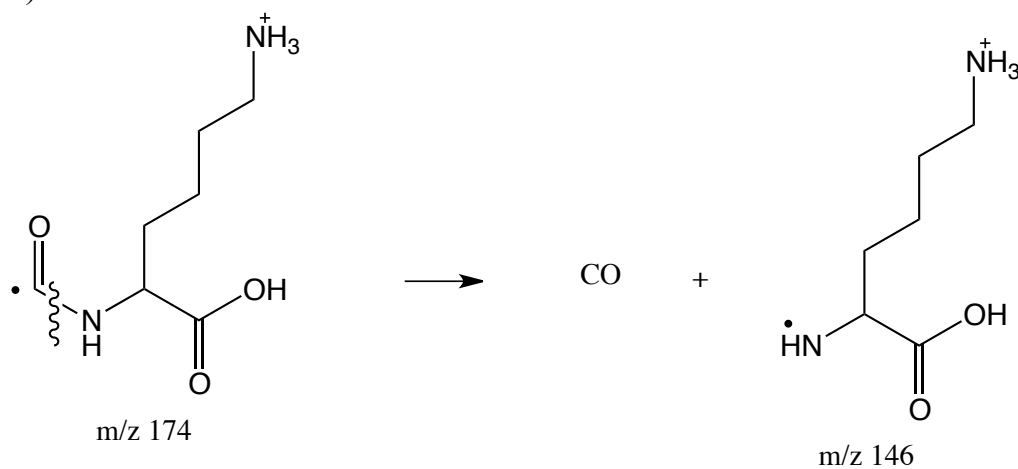

3)

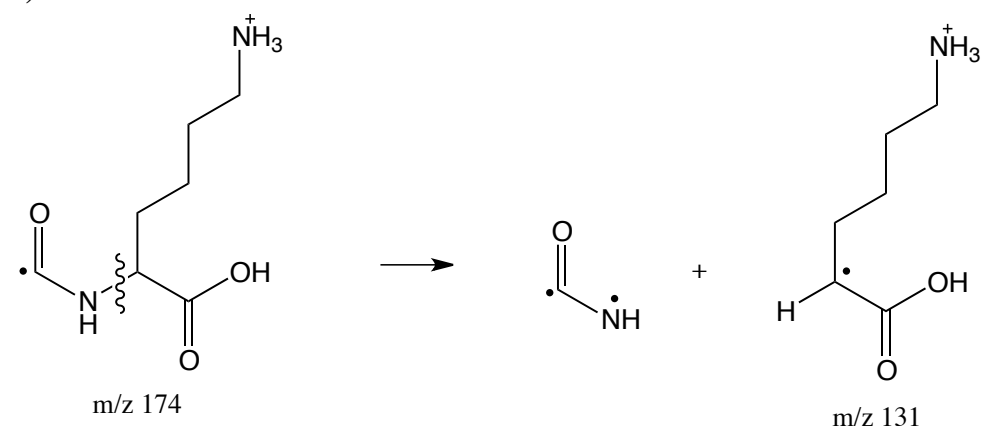

4)

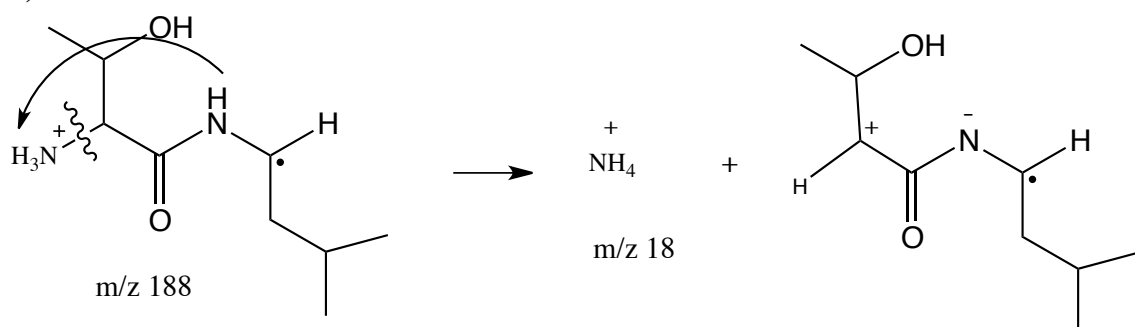

Pathway 4'

1)

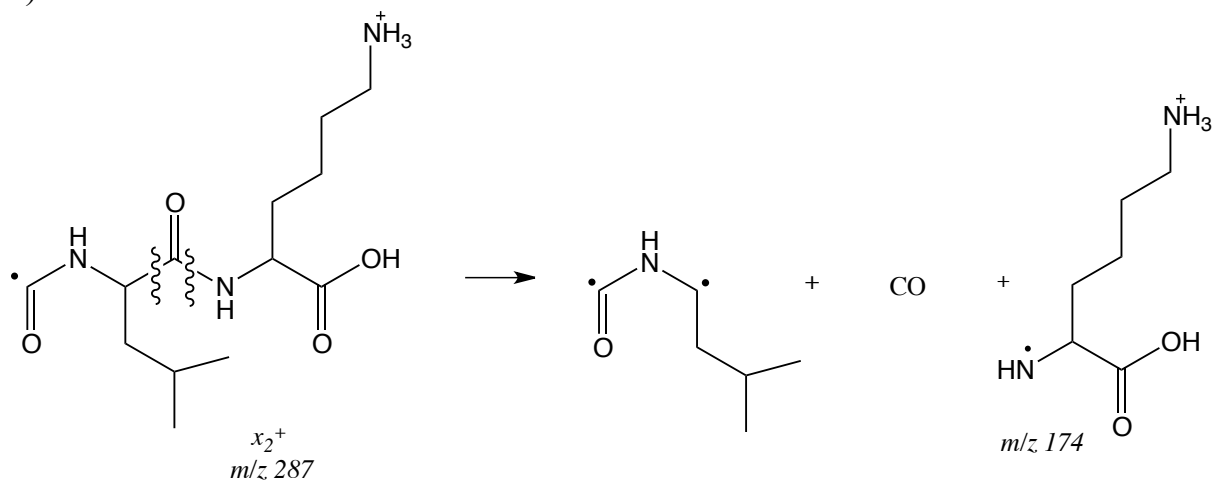

Pathway 5-1'

1)

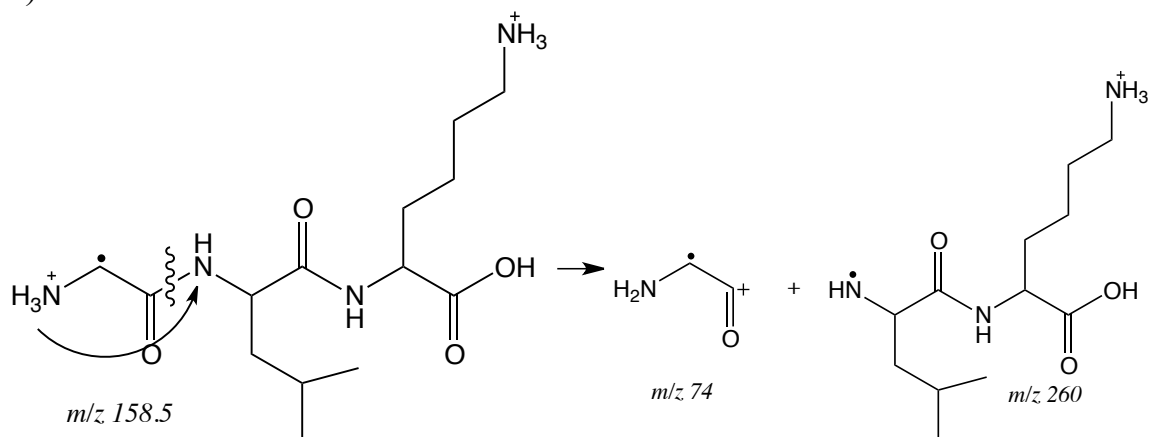

Pathway 5-3'

1)

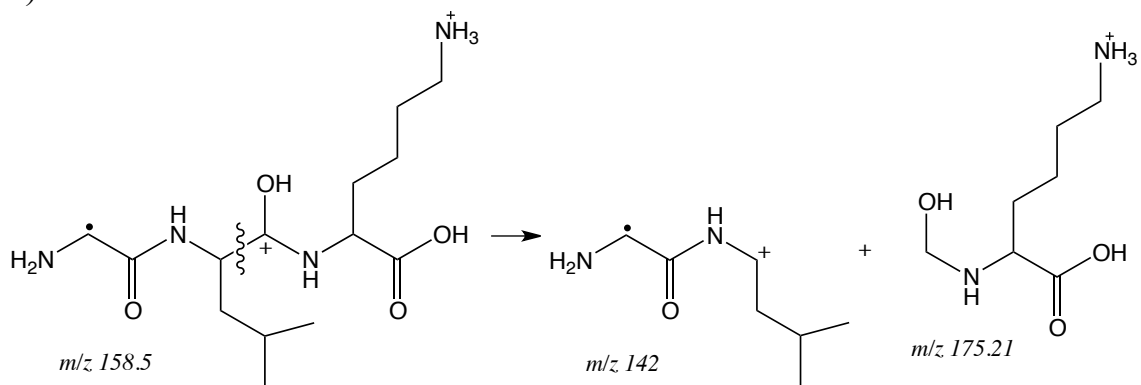

### Pathway 7'

1)

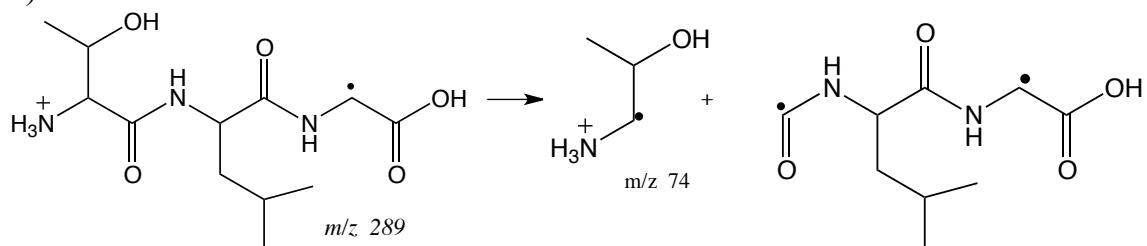

2)

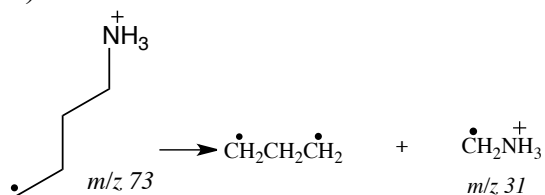

### Pathway 12'

1)

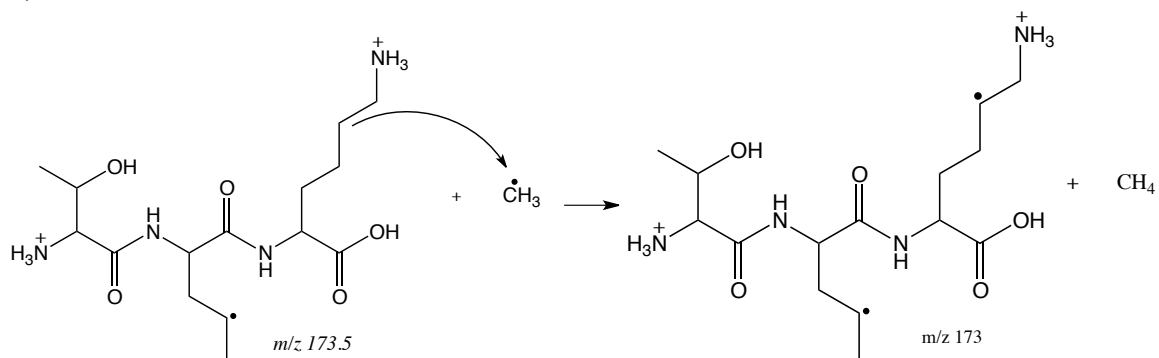

### Pathway 15'

1)

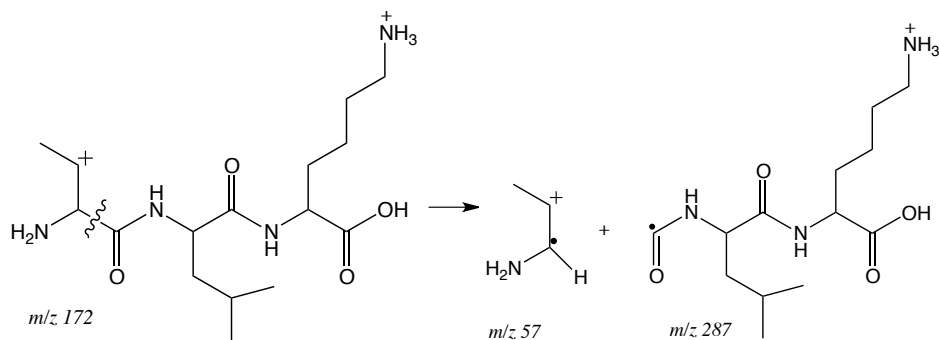

Pathway 18'

1)

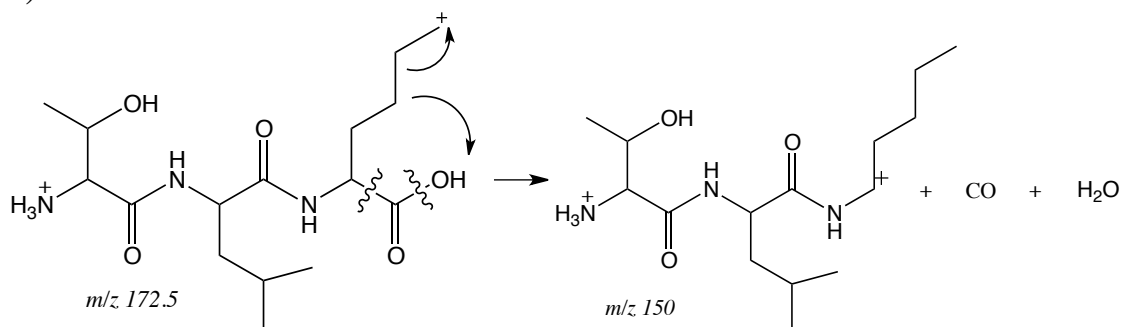

2)

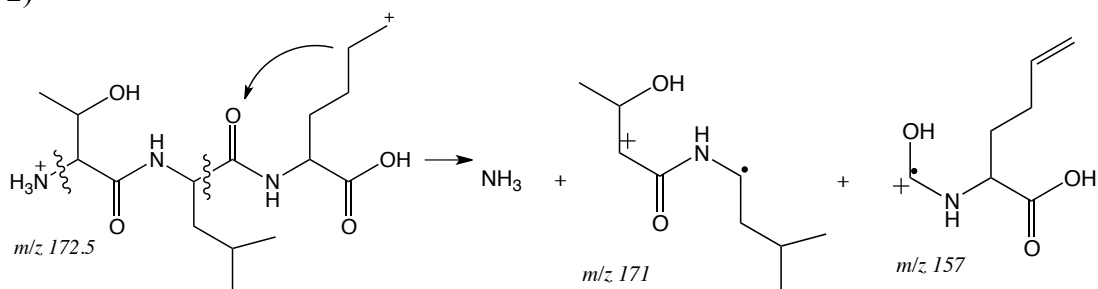

3)

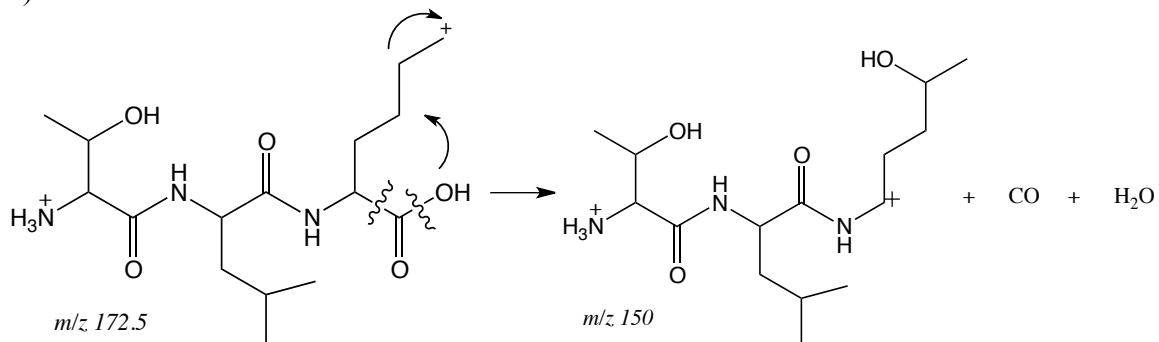

4)

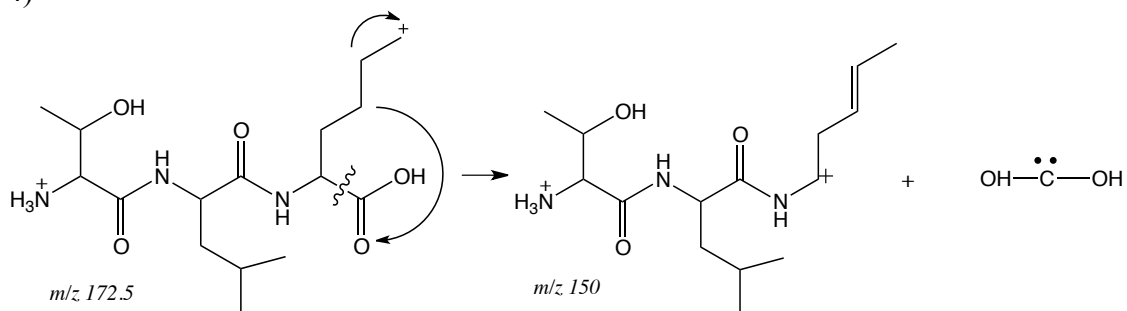



**Figure S4.** Secondary dissociations for TLK(H<sup>+</sup>)<sub>2</sub> primary dissociation pathways at  $E_{rel} = 13.0$  eV.

**Table S1.** Ions occurrence after primary and secondary dissociations.

|                            | TIK(H <sup>+</sup> ) <sub>2</sub> |      | TLK(H <sup>+</sup> ) <sub>2</sub> |      |
|----------------------------|-----------------------------------|------|-----------------------------------|------|
| E <sub>rel</sub> (eV)      | 10.8                              | 13.0 | 10.8                              | 13.0 |
| # ions (total)             | 26                                | 66   | 21                                | 61   |
| # ions with same m/z       | 26                                | 61   | 21                                | 55   |
| # ions with intensity > 2% | 10                                | 14   | 11                                | 12   |
